# Supplementary material for: A WD40 Repeat Protein from Camellia sinensis Regulates Anthocyanin and Proanthocyanidin Accumulation through the Formation of MYB–bHLH–WD40 Ternary Complexes
Source: PubMed Central journal article supplement (PMC6032167; doi:10.3390/ijms19061686), 2018-06-06
Supplement: ijms-19-01686-s001.pdf [file ijms-19-01686-s001.pdf]

# A WD40 Repeat Protein from *Camellia sinensis* Regulates Anthocyanin and Proanthocyanidin Accumulation Through the Formation of MYB–bHLH–WD40 Ternary Complexes

Yajun Liu<sup>1,†</sup>, Hua Hou<sup>1,†</sup>, Xiaolan Jiang<sup>2,†</sup>, Peiqiang Wang<sup>2</sup>, Xinlong Dai<sup>2</sup>, Wei Chen<sup>2</sup>, Liping Gao<sup>1\*</sup>, and Tao Xia<sup>2\*</sup>

TableS 1. The specific primers used in this study.

| purpose                                    | Gene               |                                      | primer sequence (5'-3')                                                            |
|--------------------------------------------|--------------------|--------------------------------------|------------------------------------------------------------------------------------|
|                                            | names              | primer name                          |                                                                                    |
| cloning                                    | <i>CsWD40</i>      | <i>CsWD40</i> -attB-HA-F             | GGGGACAAGTTTGTACAAAAAAGCAGGCTATGTACCCATACGATGT<br>TCCAGATTACGCTATGGAGAATTCGAGCCAAG |
|                                            |                    | <i>CsWD40</i> -attB-HA-R             | GGGGACCACTTTGTACAAGAAAGCTGGGTTCAACTTTCAGAAGC<br>TGC                                |
|                                            |                    | End-to-end F                         | ATGGAGAATTCGAGCCAAG                                                                |
|                                            |                    | End-to-end R                         | GATCTCAAACCTTCAGAAGCTGC                                                            |
| Real time PCR                              | <i>CsWD40</i>      | qRT-PCR-F                            | AAACTCCGTGACCTACGACTCCCCG                                                          |
|                                            |                    | qRT-PCR-R                            | CTTGGTGGGAGGGTAAGGGTGTTCG                                                          |
| Construction of protein expression vectors | <i>CsWD40</i>      | <i>CsWD40</i> -AD-F                  | ATGGAGGCCAGTGAATTCATGGAGAATTCGAGCCAAG                                              |
|                                            |                    | <i>CsWD40</i> -AD-R                  | CTCGAGCTCGATGGATCCTCAAACCTTCAGAAGCTGC                                              |
|                                            |                    | <i>CsWD40</i> -BD-F                  | GCCATGGAGGCCGAATTCATGGAGAATTCGAGCCAAG                                              |
|                                            |                    | <i>CsWD40</i> -BD-R                  | CTGCAGGTCGACGGATCCTCAAACCTTCAGAAGCTGC                                              |
|                                            | <i>CsMYB5a</i>     | <i>CsMYB5a</i> -AD-F                 | ATGGAGGCCAGTGAATTCATGGGAGGAGTCCATGCTG                                              |
|                                            |                    | <i>CsMYB5a</i> -AD-R                 | CTCGAGCTCGATGGATCCTCATGGCCAGTCCTCAGAAT                                             |
|                                            |                    | <i>CsMYB5a</i> -BD-F                 | GCCATGGAGGCCGAATTCATGGGAGGAGTCCATGCTG                                              |
|                                            |                    | <i>CsMYB5a</i> -BD-R                 | CTGCAGGTCGACGGATCCTCATGGCCAGTCCTCAGAAT                                             |
|                                            | <i>CsMYB5e</i>     | <i>CsMYB5e</i> -AD-F                 | ATGGAGGCCAGTGAATTCATGGGAAGGGCTCCTTGTTG                                             |
|                                            |                    | <i>CsMYB5e</i> -AD-R                 | CTCGAGCTCGATGGATCCTCAGATCAACAAAGATTCAG                                             |
|                                            |                    | <i>CsMYB5e</i> -BD-F                 | GCCATGGAGGCCGAATTCATGGGAAGGGCTCCTTGTTG                                             |
|                                            |                    | <i>CsMYB5e</i> -BD-R                 | CTGCAGGTCGACGGATCCTCAGATCAACAAAGATTCAG                                             |
|                                            | <i>CsAN2</i>       | <i>CsAN2</i> -AD-F                   | ATGGAGGCCAGTGAATTCATGGACATTGTTTGTGTGTTT                                            |
|                                            |                    | <i>CsAN2</i> -AD-R                   | CTGCAGGTCGACGGATCCTCATTATCACCTAACAGATCC                                            |
|                                            |                    | <i>CsAN2</i> -BD-F                   | GCCATGGAGGCCGAATTCATGGACATTGTTTGTGTGTTT                                            |
|                                            |                    | <i>CsAN2</i> -BD-R                   | CTGCAGGTCGACGGATCCTCATTATCACCTAACAGATCC                                            |
| <i>CsTT8</i>                               | <i>CsTT8</i> -AD-F | ATGGAGGCCAGTGAATTCCTCTGGTGTGGATTACC  |                                                                                    |
|                                            | <i>CsTT8</i> -AD-R | CTCGAGCTCGATGGATCCTCAGTTCTGGGGTATTAT |                                                                                    |
|                                            | <i>CsTT8</i> -BD-F | GCCATGGAGGCCGAATTCCTCTGGTGTGGATTACC  |                                                                                    |

|                        |               |                       |                                      |
|------------------------|---------------|-----------------------|--------------------------------------|
|                        |               | <i>Cs TT8</i> -BD-R   | CTGCAGGTCGACGGATCCTCAGTTCTGGGGTATTAT |
|                        |               | <i>CsGL3</i> -AD-F    | ATGGAGGCCAGTGAATTCATGTGTTGGGCAATGGCT |
|                        | <i>CsGL3</i>  | <i>CsGL3</i> -AD-R    | CTCGAGCTCGATGGATCCCTAACACTTGCCAGCAAT |
|                        |               | <i>CsGL3</i> -BD-F    | GCCATGGAGGCCGAATTCATGTGTTGGGCAATGGCT |
|                        |               | <i>CsGL3</i> -BD-R    | CTGCAGGTCGACGGATCCCTAACACTTGCCAGCAAT |
|                        | <i>NtCHS</i>  | <i>NtCHS</i> -qRT- F  | TGCTAAGCGAATACGGGAAC                 |
|                        |               | <i>NtCHS</i> -qRT- R  | AACAGAAACACTGCGGAGGA                 |
|                        | <i>NtF3'H</i> | <i>NtF3'H</i> -qRT- F | TTGTCCCGAATGACTTACG                  |
|                        |               | <i>NtF3'H</i> -qRT- R | GCATAGTAGGTAGCGGAGGTG                |
|                        | <i>NtDFR</i>  | <i>NtDFR</i> -qRT- F  | GCGAAAGGGAGGTATATGTGCTC              |
|                        |               | <i>NtDFR</i> -qRT- R  | TGCTTGTCCCTCGGTACTCAGTA              |
|                        | <i>NtFLS</i>  | <i>NtFLS</i> -qRT- F  | TGAAGGGAAAAGGGGTTGG                  |
|                        |               | <i>NtFLS</i> -qRT- R  | ACTCCTCATTGCTTCCCTGTAG               |
|                        | <i>NtLAR</i>  | <i>NtLAR</i> -qRT- F  | GCAGCAGAAGACTATAGAAGTGTG             |
|                        |               | <i>NtLAR</i> -qRT- R  | CATGTGTTAGAGCTGCAACTACAC             |
| Quantitative<br>RT-PCR | <i>NtANS</i>  | <i>NtANS</i> -qRT- F  | ACTACTACCCCAAATGTCCCAAC              |
|                        |               | <i>NtANS</i> -qRT- R  | CCGTTACCCACTGTCTTCATAGA              |
|                        | <i>NtANR</i>  | <i>NtANR</i> -qRT- F  | CTTGAAGGTATGCAGATGTT                 |
|                        |               | <i>NtANR</i> -qRT- R  | GCAGAGCAAACATATCGTCCAG               |
|                        | <i>NtAN2</i>  | <i>NtAN2</i> -qRT- F  | GAAGAAAGGTGCATGGACTG                 |
|                        |               | <i>NtAN2</i> -qRT- R  | TCTGCAGCTCTTCTGCATC                  |
|                        | <i>NtAN1a</i> | <i>NtAN1a</i> -qRT- F | ACCATTCTCGAACCCGAAG                  |
|                        |               | <i>NtAN1a</i> -qRT- R | TGCTAGGGCACAATGTGAAG                 |
|                        | <i>NtAN1b</i> | <i>NtAN1b</i> -qRT- F | CTTGAACACTTCTCA AACCGA               |
|                        |               | <i>NtAN1b</i> -qRT- R | TGCTAGGGCACAATGTGAAG                 |

```

CSWD40  MENSQDS.HLRSE.....NSVYDSYFLYAMAFSSARSFP.HHHRVAGSEHEVNRVDIVSEF...EETLMTKNG...EGRYPPTK  83
PHAN11  MENSQDSQHLRSE.....NSVYDSYFLYAMAFSSFFTP...RRRVAAGSEHELNRRVVELLSFN...EETLLNPH...EGRYPPTK  81
GHITG1  MENSQDS.HLRSD.....NSVYDSYFLYAMAFSSSTPSTN.INHQVAGSEHELDVNRVDIISFD...PETLSFRTH...EGRYPPTK  84
ATTG1   MNSAPDS.LRSE.....TAVYDSYFLYAMAFSSLRSS...SGHRVAGSEHELDVNRVDIISFD...SDSMTVKPL...EGRYPPTK  81
INWD    MVNSTQGS.NLRSE.....NSVYDSYFLYAMAFSSFAAHHGLRRRSVAVGSEHEVNRVVELLSEF...EDTVLKRTH...EGRYPPTK  85
PFWD    MENSQDS.HRPE.....NVVYDSYFLYAMAFS.AVN...RRRVAAGSEHELNRRVVELLSFN...EDSSSLRFT...EGRYPPTK  78
VWVDR1  MERSSQES.HLRSE.....NCVYDSYFLYAMAFSSSTQH...HHPRVAGSEHELDVNRVDIISFD...EDALAIRTH...EGRYPPTK  81
MTWD    MNSQDSQSHLRSDN.....NSVYDSYFLYAMAFSSFN.TNSP...CQRVAGSEHELDVNRVDIISFD...PDTLSLRFT...EGRYPPTK  82
ZMPAC1  MDPPKPSVAVSSGPEPFPNPHATCELFHSIYALAFSPVAP.....VLAGSEHELDVNRVDIISFDVPRPSAASFRAI...EGRYPPTK  88
VWVDR2  MGASDPYQDASDE...CQKRSEIYVEAFWHIYAMNWSVRDK...KYRVAAGSEHELDVNRVVEVLQD...DSTGEIRSD...EGRYPPTK  86
MDITG1  MENSQDS.HLRAE.....NSVYDSYFLYAMAFSPQTRTR.HQHRRVAGSEHEVNRVDIISFD...PDTLSIRKPH...EGRYPPTK  84
PITG1   MENSAPDS.HLQSE.....NSVYDSYFLYAMAFSPQTRNR.HQHRRVAGSEHEVNRVDIISFD...PDTLSIRKPH...EGRYPPTK  84
MITG1   LIFSEPSLR.....AAVYDSYFLYAMAFSSSR...AGQVAGSEHELDVNRVDIISFD...SDSMTVKPL...EGRYPPTK  69
FGWD40  MNSQDSQSHLRSD.....HSVYDSYFLYAMAFSPRRHGH...NHRVAGSEHEVNRVDIVSEF...PDTLLKRF...EGRYPPTK  83
Consensus  t          a s e n          p l f h y p p t k

CSWD40  LMFENFAS...LRKSSDILASSGDYFLRW...EVRD..NSIEISILNNSKTS  EFCALTSFDWNEVDARRIGTSIDTTCTWD  ERGWVE  169
PHAN11  LMFENFIK...SNN..DILASSGDYFLRW...EVKE..SSIEPLTILNNSKTS  EYCALTSFDWNEVEPRIGTSIDTTCTWD  EKGWVE  164
GHITG1  LMFENRKSASSSSCSDLASTGDFLRW...EVRE..SSIEPVTILNNSKTS  EFCALTSFDWNEVEPRIGTSIDTTCTWD  EKGWVE  172
ATTG1   LMFSEPSLR...RPSGDLASSGDYFLRW...EINEDSSTVEPISVLNNSKTS  EFCALTSFDWNEVEPRIGTSIDTTCTWD  EKGWVE  168
INWD    LMFENFTA...SMKSADLVSSGDYFLRW...EVRE..ASIEPVSILNNSKTS  EYCALTSFDWNEVEPRIGTSIDTTCTWD  EKGWVE  170
PFWD    LMFSEVSA...FSN..LASSGDYFLRW...EVRD..SSIVAVSILNNSKTS  EYCALTSFDWNEVEPRIGTSIDTTCTWD  EKGWVE  160
VWVDR1  LMFENFS.....RTSPDFHASSGDYFLRW...EVRD..NSIQPLSVLNNSKTS  EFCALTSFDWNEVEPRIGTSIDTTCTWD  ERGWVE  163
MTWD    LMFENFATHSSLQRTSSDLASTGDFLRW...EVRE..NSVEALSILNNSKTS  EFCALTSFDWNEVEPRIGTSIDTTCTWD  ERGWVE  169
ZMPAC1  LMFENR.....AAAFSLIASSADLRIWHPTLDDLSDTAPAPELRSVLDNRKAS  EFCALTSFDWNEVEPRIGTSIDTTCTWD  DRGWVE  177
VWVDR2  LMFENFKD...CQRFDLASTGDFLRW...NISD..DRVELKOLLNNSKTS  EFCALTSFDWNEVEPRIGTSIDTTCTWD  ERRTVD  169
MDITG1  LMFENFNA...LHKINDVASSGDYFLRW...EVGD..SIVEPIQLNNSKTS  EFCALTSFDWNEVEPRIGTSIDTTCTWD  EKGWVE  169
PITG1   LMFENFNS...LHKSNDVASSGDYFLRW...EVRD..SSVEPIQLNNSKTS  EFCALTSFDWNEVEPRIGTSIDTTCTWD  EKGWVE  169
MITG1   LMFSEPSLR...RPSGDLASSGDYFLRW...EVSEDSSTVEPISVLNNSKTS  EFCALTSFDWNEVEPRIGTSIDTTCTWD  EKGWVE  156
FGWD40  LMFSEPSLR.....SDLASSGDYFLRW...EVRD..SSVEPVSILNNSKTS  EFCALTSFDWNEVEPRIGTSIDTTCTWD  EKSQVE  161
Consensus  f p          l          lr          s e p l t s f d w n e v e p r i g t s i d t t c t w d          v

CSWD40  TQLAHDREYNDIAWCEAGVFSVSADGSVRFILRDKEHSTIYESIPDTEFLRIANNQDILRYWATIIMPENKRWLILRSSTIPVAELRRR  265
PHAN11  TQLAHDREYNDIAWCEAGVFSVSADGSVRFILRDKEHSTIYESIPDTEFLRIANNQDILRYWATIIMPENKRWLILRSSTIPVAELRRR  260
GHITG1  TQLAHDREYNDIAWCEARVFSVSADGSVRFILRDKEHSTIYESIPDTEFLRIANNQDILRYWATIIMPENKRWLILRSSTIPVAELRRR  268
ATTG1   TQLAHDREYNDIAWCEARVFSVSADGSVRFILRDKEHSTIYESIPDTEFLRIANNQDILRYWATIIMPENKRWLILRSSTIPVAELRRR  264
INWD    TQLAHDREYNDIAWCEAGVFSVSADGSVRFILRDKEHSTIYESIPDTEFLRIANNQDILRYWATIIMPENKRWLILRSSTIPVAELRRR  266
PFWD    TQLAHDREYNDIAWCEAGVFSVSADGSVRFILRDKEHSTIYESIPDTEFLRIANNQDILRYWATIIMPENKRWLILRSSTIPVAELRRR  256
VWVDR1  TQLAHDREYNDIAWCEAGVFSVSADGSVRFILRDKEHSTIYESIPDTEFLRIANNQDILRYWATIIMPENKRWLILRSSTIPVAELRRR  259
MTWD    TQLAHDREYNDIAWCEARVFSVSADGSVRFILRDKEHSTIYESIPDTEFLRIANNQDILRYWATIIMPENKRWLILRSSTIPVAELRRR  265
ZMPAC1  TQLAHDREYNDIAWCEAGVFSVSADGSVRFILRDKEHSTIYESIPDTEFLRIANNQDILRYWATIIMPENKRWLILRSSTIPVAELRRR  273
VWVDR2  TQLAHDREYNDIAWCEAGVFSVSADGSVRFILRDKEHSTIYESIPDTEFLRIANNQDILRYWATIIMPENKRWLILRSSTIPVAELRRR  265
MDITG1  TQLAHDREYNDIAWCEARVFSVSADGSVRFILRDKEHSTIYESIPDTEFLRIANNQDILRYWATIIMPENKRWLILRSSTIPVAELRRR  265
PITG1   TQLAHDREYNDIAWCEARVFSVSADGSVRFILRDKEHSTIYESIPDTEFLRIANNQDILRYWATIIMPENKRWLILRSSTIPVAELRRR  265
MITG1   TQLAHDREYNDIAWCEARVFSVSADGSVRFILRDKEHSTIYESIPDTEFLRIANNQDILRYWATIIMPENKRWLILRSSTIPVAELRRR  252
FGWD40  TQLAHDREYNDIAWCEARVFSVSADGSVRFILRDKEHSTIYESIPDTEFLRIANNQDILRYWATIIMPENKRWLILRSSTIPVAELRRR  257
Consensus  tqla h d r e y n d i a w c e a g v f s v s a d g s v r f i l r d k e h s t i y e s i p d t e f l r i a n n q d i l r y w a t i i m p e n k r w l i l r s s t i p v a e l r r r

CSWD40  ASVNAIWAQCSHRFICSGEDDSCALIMVPTVAGPN...GDEMSYVAGAEIQLQWAAALPFWIAVPSAAQIQK  341
PHAN11  ASVNAIWAQCSHRFICSGEDDSCALIMVPTVAGPN...GDEMSYVAGAEIQLQWSPAQRWIAVPSAAQIQK  336
GHITG1  ASVNAIWAQCSHRFICSGEDDSCALIMVPTVAGPN...GDECVYVAGAEIQLQWSPAQRWIAVPSAAQIQK  344
ATTG1   ASVNAIWAQCSHRFICSGEDDSCALIMVPTVAGPN...GDEMSYVAGAEIQLQWSSSQPFWIAVPSAAQIQK  340
INWD    ASVNAIWAQCSHRFICSGEDDSCALIMVPTVAGPN...GDEMSYVAGAEIQLQWAAQPFWIAVPSAAQIQK  342
PFWD    ASVNAIWAQCSHRFICSGEDDSCALIMVPTVAGPN...GDEITVYVAGAEIQLQWAAQPFWIAVPSAAQIQK  332
VWVDR1  ASVNAIWAQCSHRFICSGEDDSCALIMVPTVAGPN...GDEMSYVAGAEIQLQWAAQPFWIAVPSAAQIQK  335
MTWD    ASVNAIWAQCSHRFICSGEDDSCALIMVPTVAGPN...GDEITVYVAGAEIQLQWAAQPFWIAVPSAAQIQK  341
ZMPAC1  ASVNAIWAQCSHRFICSGEDDSCALIMVPTVAGPN...GDEVLVWVAGAEIQLQWAAQPFWIAVPSAAQIQK  352
VWVDR2  ASVNAIWAQCSHRFICSGEDDSCALIMVPTVAGPN...GDELLVWVAGAEIQLQWSSSQPFWIAVPSAAQIQK  343
MDITG1  ASVNAIWAQCSHRFICSGEDDSCALIMVPTVAGPN...GDEMSYVAGAEIQLQWAAQPFWIAVPSAAQIQK  341
PITG1   ASVNAIWAQCSHRFICSGEDDSCALIMVPTVAGPN...GDEMSYVAGAEIQLQWAAQPFWIAVPSAAQIQK  341
MITG1   ASVNAIWAQCSHRFICSGEDDSCALIMVPTVAGPN...GDEMSYVAGAEIQLQWSSSQPFWIAVPSAAQIQK  328
FGWD40  ASVNAIWAQCSHRFICSGEDDSCALIMVPTVAGPN...GDEMSYVAGAEIQLQWAAQPFWIAVPSAAQIQK  333
Consensus  a s v n a i w a q c s h r f i c s g e d d s c a l i m v p t v a g p n . . . g d e m s y v a g a e i q l q w a a l p f w i a v p s a a q i q k

```

**Figure S1.** Amino acid alignment of CsWD40 proteins from tea plants and its orthologs from other plants

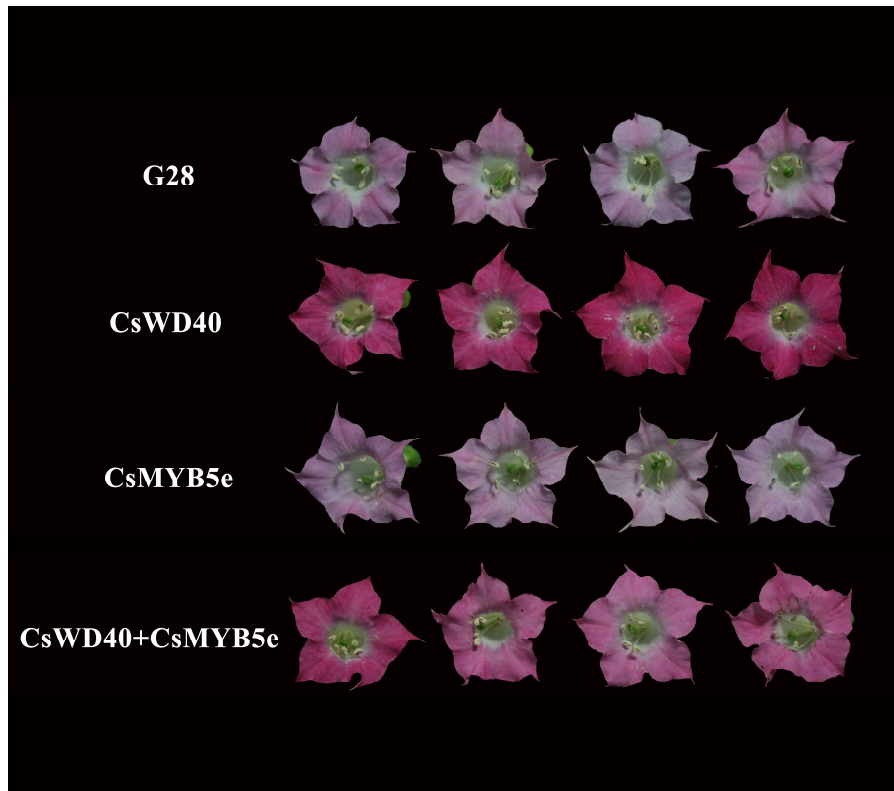

**Figure S2.** Flower pigmentations of *CsWD40*, *CsMYB5e*, and *CsWD40*♀*CsMYB5e*♂ (or *CsWD40*♂*CsMYB5e*♀) transgenic tobaccos.
